# Supplementary material
Source: publisher figshare collection journal article supplement (https://sage.figshare.com/ndownloader/files/17636510)
Supplement: Supplementary file 1 [file 17636510]

## Supplement 2. Characteristics of included studies

| Study ID<br>(First author, year) | Study population<br>(Country)                                   | Major ethnicity | Interventions     |                               |                  |                                                     |          | Treatment duration              | Hot flush severity assessment tools<br>(evaluation duration) | Time point for primary outcome assessment |
|----------------------------------|-----------------------------------------------------------------|-----------------|-------------------|-------------------------------|------------------|-----------------------------------------------------|----------|---------------------------------|--------------------------------------------------------------|-------------------------------------------|
|                                  |                                                                 |                 | Acupuncture group |                               | Control group 1* | Control group 2**                                   |          |                                 |                                                              |                                           |
|                                  |                                                                 |                 | Style             | Protocol                      |                  | Style                                               | Protocol |                                 |                                                              |                                           |
| Avis 2008 <sup>20</sup>          | Perimenopausal and postmenopausal women (US)                    | White           | A2                | Semi-standardized acupuncture | S2               | Non-acupuncture point shallow needling              | -        | 16 sessions during 8 weeks      | Mean severity score (24 hours)                               | 8 weeks                                   |
| Avis 2016 <sup>23</sup>          | Perimenopausal and postmenopausal women (US)                    | White           | A2                | Individualized acupuncture    | -                | -                                                   | W        | Up to 20 sessions over 6 months | VMS severity index (24 hours)                                | 6 months                                  |
| Ee 2016 <sup>16</sup>            | Postmenopausal and late menopausal transition women (Australia) | Caucasian       | A1                | Standardized acupuncture      | S1               | Park sham device at non-acupuncture point           | -        | 10 sessions during 8 weeks      | HF severity (24 hours)                                       | 8 weeks                                   |
| Huang 2006 <sup>17</sup>         | Postmenopausal women (US)                                       | White           | A1                | Semi-standardized acupuncture | S1               | Streitberger device at non-acupuncture point        | -        | 9 sessions during 7 weeks       | HF intensity (night time)                                    | 7 weeks                                   |
| Kim 2007 <sup>21</sup>           | Postmenopausal women (Korea)                                    | Not reported    | A2                | Standardized acupuncture      | S2               | Acupuncture point shallow needling                  | -        | 16 sessions during 8 weeks      | VAS for HF severity (uncertain)                              | 8 weeks                                   |
| Kim 2011 <sup>22</sup>           | Perimenopausal or postmenopausal women (Korea)                  | Not reported    | A2                | Standardized acupuncture      | S2               | Non-acupuncture point shallow needling              | -        | 11 sessions during 7 weeks      | HF severity (24 hours)                                       | 7 weeks                                   |
| Nir 2007 <sup>18</sup>           | Postmenopausal women (US)                                       | Caucasian       | A1                | Semi-standardized acupuncture | S1               | Streitberger device at non-acupuncture point        | -        | 9 sessions during 7 weeks       | HF severity (24 hours)                                       | 7 weeks                                   |
| Painovich 2012 <sup>19</sup>     | Perimenopausal or postmenopausal women (US)                     | Not reported    | A1                | Standardized acupuncture      | S1               | Sham device (unidentified) at non-acupuncture point | W        | 36 sessions during 12 weeks     | MENQOL-vasomotor domain (24 hours)                           | 12 weeks                                  |

A1: acupuncture with sham base unit; A2: acupuncture without sham base unit; S1: non-insertion sham acupuncture (sham device with sham base unit); S2: insertion sham acupuncture (without sham base unit); W: waiting list; \*: sham control group; \*\*: waiting list control group; HF: hot flushes; VMS: vasomotor symptoms; MENQOL: The Menopause-Specific Quality of Life
